# Supplementary material for: The productive performance of intercropping
Source: PubMed Central journal article supplement — Proc Natl Acad Sci U S A. 2023 Jan 3;120(2):e2201886120. doi: 10.1073/pnas.2201886120 (PMC9926256; doi:10.1073/pnas.2201886120), 2023-01-03
Supplement: pnas.2201886120.sapp.pdf [file pnas.2201886120.sapp.pdf]

## Supplementary Information for

### The productive performance of intercropping

Chunjie Li, Tjeerd-Jan Stomph, David Makowski, Haigang Li, Chaochun Zhang, Fusuo Zhang, Wopke van der Werf

Fusuo Zhang, [zhangfs@cau.edu.cn](mailto:zhangfs@cau.edu.cn); Wopke van der Werf, [wopke.vanderwerf@wur.nl](mailto:wopke.vanderwerf@wur.nl)

#### Table of Contents

|                                                                                                                                                                                                                            |    |
|----------------------------------------------------------------------------------------------------------------------------------------------------------------------------------------------------------------------------|----|
| <b>Method S1</b> List of the 132 publications used in this meta-analysis                                                                                                                                                   | 3  |
| <b>Method S2</b> Additive partitioning method to calculate complementarity effect and selection effect and the mathematical relationships between the net effect ratio, the land equivalent ratio and the selection effect | 14 |
| <b>Fig. S1</b> Bivariate scatter plots illustrating relationships between different metrics                                                                                                                                | 16 |
| <b>Fig. S2</b> Transgressive overyielding across all species combinations                                                                                                                                                  | 18 |
| <b>Fig. S3</b> Effect size of different metrics across species combinations                                                                                                                                                | 20 |
| <b>Fig. S4</b> Relationships between the transgressive overyielding index and yield ratio, both for grain yield and protein yield                                                                                          | 23 |
| <b>Fig. S5</b> Relationships between the transgressive overyielding index for calorie and protein yield and grain yield ratio calorie yield ratio, protein yield ratio and N fertilizer input                              | 24 |
| <b>Fig. S6</b> Boxplots illustrating how the complementarity effect and selection effect of species mixtures vary between different species combinations and                                                               | 25 |

how they are related to yield ratio of the sole crops

|                                                                                                                                      |    |
|--------------------------------------------------------------------------------------------------------------------------------------|----|
| <b>Fig. S7</b> Scatter plot of LER, NER and TOI for grain yield and TOI for protein yield against relative density total             | 26 |
| <b>Fig. S8</b> Funnel plots                                                                                                          | 27 |
| <b>Table S1</b> Contingency table for number of data records of intercrops including maize, non-maize, legume and non-legume species | 28 |
| <b>Table S2</b> Overview of species combinations in the data set                                                                     | 29 |
| <b>Table S3</b> Number of data records with substitutive and additive designs                                                        | 34 |
| <b>Table S4</b> Number of data records representing strip intercropping, alternate-row intercropping and mixed intercropping         | 31 |
| <b>SI References</b>                                                                                                                 | 32 |

## Method S1 List of the 132 publications used in this meta-analysis

We used a dataset by Li et al. (2020) (1) which was generated by combining databases by Yu et al (2015) (2) and Li et al (2020) (1). Publications extracted by Yu et al. (2015) (2) are labelled as Refs 1-63 and publications extracted by Li et al. (2020) (1) are labelled as Ref 64-132.

1. Agegnehu, G., Ghizaw, A., Sinebo, W., 2006. Yield performance and land-use efficiency of barley and faba bean mixed cropping in Ethiopian highlands. *Eur. J. Agron.* 25, 202-207.
2. Agegnehu, G., Ghizaw, A., Sinebo, W., 2008. Yield potential and land-use efficiency of wheat and faba bean mixed intercropping. *Agron. Sustain. Dev.* 28, 257-263.
3. Aggarwal, P., Garrity, D.P., Liboon, S., Morris, R., 1992. Resource use and plant interactions in a rice-mungbean intercrop. *Agron. J.* 84, 71-78.
4. Ahmed, F., Hirota, O., Yamada, Y., Haraguchi, T., Matsumoto, M., Mochizuki, T., 2000. Studies on yield, land equivalent ratio and crop performance rate in maize-mungbean intercropping. *J. Fac. Agric. Kyushu. U.* 45, 39-48.
5. Allen, J.R., Obura, R.K., 1983. Yield of corn, cowpea, and soybean under different intercropping systems. *Agron. J.* 75, 1005-1009.
6. Andersen, M., Hauggaard-Nielsen, H., Ambus, P., Jensen, E., 2005. Biomass production, symbiotic nitrogen fixation and inorganic N use in dual and tri-component annual intercrops. *Plant Soil* 266, 273-287.
7. Arlauskienė, A., Maikstienienė, S., Sarunaite, L., Kadziulienė, Z., Deveikyte, I., Zekaite, V., Cesnuleviciene, R., 2011. Competitiveness and productivity of organically grown pea and spring cereal intercrops. *Zemdirbyste* 98, 339-348.
8. Awal, M.A., Koshi, H., Ikeda, T., 2006. Radiation interception and use by maize/peanut intercrop canopy. *Agric. For. Meteorol.* 139, 74-83.
9. Banik, P., Midya, A., Sarkar, B.K., Ghose, S.S., 2006. Wheat and chickpea intercropping systems in an additive series experiment: advantages and weed smothering. *Eur. J. Agron.* 24, 325-332.
10. Banik, P., Sasmal, T., Ghosal, P., Bagchi, D., 2000. Evaluation of Mustard (*Brassica campestris* Var. Toria) and Legume Intercropping under 1: 1 and 2: 1 Row-Replacement Series Systems. *J. Agron. Crop Sci.* 185, 9-14.
11. Bedoussac, L., Justes, E., 2010. The efficiency of a durum wheat-winter pea intercrop to improve yield and wheat grain protein concentration depends on N availability during early growth. *Plant Soil* 330, 19-35.

12. Bulson, H.A.J., Snaydon, R.W., Stopes, C.E., 1997. Effects of plant density on intercropped wheat and field beans in an organic farming system. *J. Agric. Sci.* 128, 59-71.
13. Carr, P.M., Gardner, J.J., Schatz, B.G., Zwinger, S.W., Guldan, S.J., 1995. Grain yield and weed biomass of a wheat-lentil intercrop. *Agron. J.* 87, 574-579.
14. Carruthers, K., Prithiviraj, B., Fe, Q., Cloutier, D., Martin, R.C., Smith, D.L., 2000. Intercropping corn with soybean, lupin and forages: yield component responses. *Eur. J. Agron.* 12, 103-115.
15. Chabi-Olaye, A., Nolte, C., Schulthess, F., Borgemeister, C., 2005. Relationships of intercropped maize, stem borer damage to maize yield and land-use efficiency in the humid forest of Cameroon. *Bull. Entomol. Res.* 95, 417-427.
16. Chang, J., Shibles, R.M., 1985. An analysis of competition between intercropped cowpea and maize II. The effect of fertilization and population density. *Field Crops Res.* 12, 145-152.
17. Chowdhury, M., Rosario, E., 1994. Comparison of nitrogen, phosphorus and potassium utilization efficiency in maize/mungbean intercropping. *J. Agric. Sci.* 122, 193-199.
18. Ciftci, V., Ulker, M., 2005. Economic benefits of mixed cropping of lentil (*Lens culinaris*) with wheat (*Triticum aestivum*) and barley (*Hordeum vulgare*) at different seeding ratios. *Indian J. Agric. Sci.* 75, 100-102.
19. Clément, A., Chalifour, F.-P., Gendron, G., Bharati, M.P., 1992. Effects of nitrogen supply and spatial arrangement on the grain yield of a maize/soybean intercrop in a humid subtropical climate. *Can. J. Plant Sci.* 72, 57-67.
20. Corre-Hellou, G., Fustec, J., Crozat, Y., 2006. Interspecific Competition for Soil N and its Interaction with N<sub>2</sub>Fixation, Leaf Expansion and Crop Growth in Pea-Barley Intercrops. *Plant Soil* 282, 195-208.
21. Das, S.R., Mahapatra, P.K., Satpathy, D., Uttaray, S.K., 1991. Studies on pigeonpea + groundnut intercropping system. *Indian J. Agron.* 36, 129-131.
22. Fisher, N.M., 1979. Studies in mixed cropping. III. Further results with maize-bean mixtures. *Exp. Agric.* 15, 49-58.
23. Ghaley, B., Hauggaard-Nielsen, H., Høgh-Jensen, H., Jensen, E., 2005. Intercropping of Wheat and Pea as Influenced by Nitrogen Fertilization. *Nutr. Cycl. Agroecosyst.* 73, 201-212.
24. Giri, G., 1990. Studies on pigeonpea + groundnut intercropping under rain-fed conditions. *Indian J. Agron.* 35, 446-449.
25. Gunes, A., Inal, A., Adak, M.S., Alpaslan, M., Bagci, E.G., Erol, T., Pilbeam, D.J., 2007. Mineral nutrition of wheat, chickpea and lentil as affected by mixed cropping and soil moisture. *Nutr. Cycl. Agroecosyst.* 78, 83-96.

26. Hauggaard-Nielsen, H., Ambus, P., Jensen, E.S., 2001. Interspecific competition, N use and interference with weeds in pea–barley intercropping. *Field Crops Res.* 70, 101-109.
27. Hauggaard-Nielsen, H., Ambus, P., Jensen, E.S., 2003. The comparison of nitrogen use and leaching in sole cropped versus intercropped pea and barley. *Nutr. Cycl. Agroecosyst.* 65, 289-300.
28. Hauggaard-Nielsen, H., Andersen, M.K., Jørnsgaard, B., Jensen, E.S., 2006. Density and relative frequency effects on competitive interactions and resource use in pea–barley intercrops. *Field Crops Res.* 95, 256-267.
29. Hauggaard-Nielsen, H., Jensen, E.S., 2001. Evaluating pea and barley cultivars for complementarity in intercropping at different levels of soil N availability. *Field Crops Res.* 72, 185-196.
30. Haymes, R., Lee, H.C., 1999. Competition between autumn and spring planted grain intercrops of wheat (*Triticum aestivum*) and field bean (*Vicia faba*). *Field Crops Res.* 62, 167-176.
31. Helenius, J., Jokinen, K., 1994. Yield advantage and competition in intercropped oats (*Avena sativa* L.) and faba bean (*Vicia faba* L.): Application of the hyperbolic yield-density model. *Field Crops Res.* 37, 85-94.
32. Jahansooz, M.R., Yunusa, I.A.M., Coventry, D.R., Palmer, A.R., Eamus, D., 2007. Radiation- and water-use associated with growth and yields of wheat and chickpea in sole and mixed crops. *Eur. J. Agron.* 26, 275-282.
33. Jensen, E.S., 1996. Grain yield, symbiotic N-2 fixation and interspecific competition for inorganic N in pea-barley intercrops. *Plant Soil* 182, 25-38.
34. Knudsen, M.T., Hauggaard-Nielsen, H., Jørnsgaard, B., Jensen, E.S., 2004. Comparison of interspecific competition and N use in pea-barley, faba bean-barley and lupin-barley intercrops grown at two temperate locations. *J. Agric. Sci.* 142, 617-627.
35. Kontturi, M., Laine, A., Niskanen, M., Hurme, T., Hyovela, M., Peltonen-Sainio, P., 2011. Pea-oat intercrops to sustain lodging resistance and yield formation in northern European conditions. *Acta Agric. Scand. Sect. B Soil Plant Sci.* 61, 612-621.
36. Mandal, B.K., Mahapatra, S.K., 1990. Barley, lentil, and flax yield under different intercropping systems. *Agron. J.* 82, 1066-1068.
37. Morgado, L.B., Willey, R.W., 2003. Effects of plant population and nitrogen fertilizer on yield and efficiency of maize-bean intercropping. *Pesqu. Agropecu. Bras.* 38, 1257-1264.
38. Morgado, L.B., Willey, R.W., 2008. Optimum plant population for maize-bean intercropping system in the Brazilian semi-arid region. *Sci. Agric.* 65, 474-480.
39. Mutsaers, H., 1978. Mixed cropping experiments with maize and groundnuts. *Neth. J. Agric. Sci.*

40. Nelson, A.G., Pswarayi, A., Quideau, S., Frick, B., Spaner, D., 2012. Yield and weed suppression of crop mixtures in organic and conventional systems of the western Canadian Prairie. *Agron. J.* 104, 756-762.
41. Neumann, A., Werner, J., Rauber, R., 2009. Evaluation of yield-density relationships and optimization of intercrop compositions of field-grown pea-oat intercrops using the replacement series and the response surface design. *Field Crops Res.* 114, 286-294.
42. Ntare, B.R., 1990. Intercropping morphologically different cowpeas with pearl millet in a short season environment in the Sahel. *Exp. Agric.* 26, 41-47.
43. Ofori, F., Pate, J.S., Stern, W.R., 1987. Evaluation of N<sub>2</sub> fixation and nitrogen economy of a maize-cowpea intercrop system using N<sup>15</sup> dilution methods. *Plant Soil* 102, 149-160.
44. Ofori, F., Stern, W.R., 1986. Maize/cowpea intercrop system: Effect of nitrogen fertilizer on productivity and efficiency. *Field Crops Res.* 14, 247-261.
45. Ofori, F., Stern, W.R., 1987a. The combined effects of nitrogen fertilizer and density of the legume component on production efficiency in a maize/cowpea intercrop system. *Field Crops Res.* 16, 43-52.
46. Ofori, F., Stern, W.R., 1987b. Relative sowing time and density of component crops in maize-cowpea intercrop system. *Exp. Agric.* 23, 41-52.
47. Ong, C., Subrahmanyam, P., Khan, A., 1991. The microclimate and productivity of a groundnut/millet intercrop during the rainy season. *Agric. For. Meteorol.* 56, 49-66.
48. Ossom, E., Thwala, M., 2005. Intercropping maize with grain legumes influences weed suppression, soil temperature, and disease incidence in Swaziland. *Trop. Agric.*
49. Prasad, K., Srivastava, V., 1991. Pigeonpea and soybean intercropping systems under rain-fed situation. *Indian J. Agric. Sci.* 61, 243-246.
50. Reddy, K., Van der Ploeg, J., Maga, I., 1990. Genotype effects in millet/cowpea intercropping in the semi-arid tropics of Niger. *Exp. Agric.* 26, 387-396.
51. Reddy, M.S., Willey, R.W., 1981. Growth and resource use studies in an intercrop of pearl millet/groundnut. *Field Crops Res.* 4, 13-24.
52. Rees, D., 1986. Crop growth, development and yield in semi-arid conditions in Botswana. II. The effects of intercropping *Sorghum bicolor* with *Vigna unguiculata*. *Exp. Agric.* 22, 169-177.
53. Sarkar, R.K., Sanyal, S.R., 2000. Production potential and economic feasibility of sesame (*Sesamum indicum*)-based intercropping system with pulse and oilseed crops on rice fallow land. *Indian J. Agron.* 45, 545-550.
54. Schmidtke, K., Neumann, A., Hof, C., Rauber, R., 2004. Soil and atmospheric nitrogen uptake by lentil (*Lens culinaris* Medik.) and barley (*Hordeum vulgare* ssp. nudum L.) as monocrops and intercrops. *Field Crops Res.* 87, 245-256.

55. Silwana, T.T., Lucas, E.O., Olaniyan, A.B., 2007. The effects of inorganic and organic fertilizers on the growth and development of component crops in maize/bean intercrop in Eastern Cape of South Africa. *J. Food Agric. Environ* 5, 267-272.
56. Singh, K.K., Rathi, K.S., 2003. Dry matter production and productivity as influenced by staggered sowing of mustard intercropped at different row ratios with chickpea. *J. Agron. Crop Sci.* 189, 169-175.
57. Subedi, K., 1998. Profitability of barley and peas mixed intercropping in the subsistence farming systems of the Nepalese hills. *Exp. Agric.* 34, 465-474.
58. Subramanian, V.B., Rao, D.G., 1988. Intercropping effects on yield components of dryland sorghum, pigeonpea and mung bean. *Trop. Agric.* 65, 145-149.
59. Tobita, S., Ito, O., Matsunaga, R., Rao, T.P., Rego, T.J., Johansen, C., Yoneyama, T., 1994. Field evaluation of nitrogen fixation and use of nitrogen fertilizer by sorghum/pigeonpea intercropping on an Alfisol in the Indian semi-arid tropics. *Biol. Fertil. Soils* 17, 241-248.
60. Tomar, R.S.S., Upadhyay, M.S., Sharma, R.A., 1987. Effect of planting patterns in pigeonpea + soybean intercropping system. *Indian J. Agron.* 32, 322-325.
61. Tsubo, M., Walker, S., 2004. Shade effects on *Phaseolus vulgaris* L. intercropped with *Zea mays* L. under well-watered conditions. *J. Agron. Crop Sci.* 190, 168-176.
62. Waterer, J.G., Vessey, J.K., Stobbe, E.H., Soper, R.J., 1994. Yield and symbiotic nitrogen-fixation in a pea-mustard intercrop as influenced by N fertilizer addition. *Soil Biol. Biochem.* 26, 447-453.
63. Willey, R., Reddy, M., 1981. A field technique for separating above-and below-ground interactions in intercropping: an experiment with pearl millet/groundnut. *Exp. Agric.* 17, 257-264.
64. Cao, X.D., 2007. Benefits of sesame/peanut intercropping. *China Agricultural Information* 04. (in Chinese).
65. Chai, Q., Yang, C.H., Huang GB., 2010. Characteristics of crop water consumption of different cropping patterns in an Arid Oasis. *Journal of Desert Research.* 30, 1153-1159. (in Chinese)
66. Chen, G.P., Yu A.Z., 2014. Response of water use characteristics of maize/pea intercropping to different root partition and irrigation quota. *Acta Agriculturae Boreali-occidentalis Sinica* 23, 68-73. (in Chinese)
67. Chen, Y.X., 2007. Correlations between interspecies interactions and nitrogen utilization, diseases control and yield production in wheat/faba bean intercropping system. Doctoral thesis, China Agricultural University, Beijing (in Chinese).
68. Cheng, Y.Z., Li, L., Zhou, Q., Guo, N., Xing, H., Jiang, H.D., 2014. Growth and yield formation of maize under different maize/soybean intercropping patterns. *Journal of Nanjing Agricultural University* 39, 34-39. (in Chinese)

69. Chu, G.X., Shen, Q.R., Cao, J.L., 2004. Nitrogen fixation and N transfer from peanut to rice cultivated in aerobic soil in an intercropping system and its effect on soil N fertility. *Plant Soil* 263, 17-27.
70. Ding, H.B., 2010. The mechanism on enhancing P acquisition by intercropping between P efficient species and maize on Fluvo-Aquic soil of Quzhou. Master thesis, China Agricultural University, Beijing (in Chinese).
71. Ding, L., Jin, Y.Z., Li, Y.H., Wang, Y.B., 2014. Spatial pattern and water-saving mechanism of wheat and maize under the condition of strip-ridge intercropping. *Acta Agriculturae Boreali-occidentalis Sinica*. 23, 56-63. (in Chinese).
72. Fan, F.L., Zhang, F.S., Song, Y.N., Sun, J.H., Bao, X.G., Guo, T.W., Li, L., 2006. Nitrogen fixation of faba bean (*Vicia faba* L.) interacting with a non-legume in two contrasting intercropping systems. *Plant Soil* 283, 275-286.
73. Fang, Z.G., 2014. Effects of legume/cereal intercropping on N, Fe nutrition and biological nitrogen fixation. Doctoral thesis, China Agricultural University, Beijing (in Chinese).
74. Feng, H.C., Chen, F., Zhang, M.L., 1995. Luminous effect characters of corn/soybean intercropping. *Tillage and Cultivation*. 4, 4-6 (in Chinese).
75. Gao, H.M., 2006. The relationship between plant species interaction and root distribution of wheat/faba bean intercropping. Master's thesis, China Agricultural University, Beijing (in Chinese).
76. Gao, Y., Duan, A.W., Liu, Z.G., Sun, J.S., Chen, J.P., Wang, H.Z., 2009. Effect of intercropping patterns on dry matter accumulation and yield components of maize and soybean. *Chinese Agricultural Science Bulletin*. 25, 214-221 (in Chinese).
77. Gao, Y., Duan, A.W., Qiu, X.Q., Liu, Z.G., Sun, J.S., Zhang, J.P., Wang, H.Z., 2010a. Distribution of roots and root length density in a maize/soybean strip intercropping system. *Agr Water Manage* 98, 199-212.
78. Gao, Y., Duan, A.W., Qiu, X.Q., Sun, J.S., Zhang, J.P., Liu, H., Wang, H.Z., 2010b. Distribution and Use Efficiency of Photosynthetically Active Radiation in Strip Intercropping of Maize and Soybean. *Agron J* 102, 1149-1157.
79. Gao, Y., Duan, A.W., Sun, J.S., Li, F.S., Liu, Z.G., Liu, H., Liu, Z.D., 2009. Crop coefficient and water-use efficiency of winter wheat/spring maize strip intercropping. *Field Crops Res* 111, 65-73.
80. Gao, Y., Wu, P.T., Zhao, X.N., Wang, Z.K., 2014. Growth, yield, and nitrogen use in the wheat/maize intercropping system in an arid region of northwestern China. *Field Crops Res* 167, 19-30.
81. Gong, M.B., Song, C.Y., Hao, J.J., Wang, S.J., Li, H.W., Li, Z.Q., Zhang, X.Y., 2015. The experimental study of 'the fully mechanical intercropping pattern of summer maize-mung bean'. *Chinese Agricultural Science Bulletin* 31, 77-81 (in Chinese).



82. Jiao, N.Y., Chen, M.C., Fu, G.Z., Ning, T.Y., Wang, L.M., Li, Z.J., 2007. Studies on photosynthetic product accumulation and leaf area index in a complex population of companion cropping of corn and peanut. *Crops* 1, 34-35. (in Chinese).
83. Jiao, N.Y., Yang, M.K., Ning, T.Y., Yin, F., Xu, G.W., Fu, G.Z., Li, Y.J., 2013. Effects of maize-peanut intercropping and phosphate fertilizer on photosynthetic characteristics and yield of intercropped peanut plants. *Chinese Journal of Plant Ecology*. 37, 1010-1017 (in Chinese).
84. Jiao, N.Y., Zhao, C., Ning, T.Y., Hou, L.T., Fu, G.Z., Li Z.J., Chen, M.C., 2008. Effects of maize-peanut intercropping on economic yield and light response of photosynthesis. *Chinese Journal of Applied Ecology*. 19, 981-985. (in Chinese)
85. Lan, Y.F., Xia, H.Y., Liu, H.L., Yang, S.C., Song, J.G., Li, L. 2010. Yield and inter-specific interactions in maize/chickpea intercrop under different application rates of P in irrigated sierozem along the Yellow River in Northwest China. *Chinese Journal of Eco-Agriculture* 18, 917-922 (in Chinese).
86. Li, W.J., Chen, G.P., Chai, Q., 2014. Dry matter accumulation and distribution of alternately irrigated wheat/maize intercropping. *Journal of Gansu Agricultural University*. 49, 40-46. (in Chinese).
87. Li, L., Sun, J.H., Zhang, F.S., Guo, T.W., Bao, X.G., Smith, F.A., Smith, S.E., 2006. Root distribution and interactions between intercropped species. *Oecologia* 147, 280-290.
88. Li, L., Sun, J.H., Zhang, F.S., Li, X.L., Yang, S.C., Rengel, Z., 2001. Wheat/maize or wheat/soybean strip intercropping I. Yield advantage and interspecific interactions on nutrients. *Field Crops Res* 71, 123-137.
89. Li, L., Yang, S.C., Li, X.L., Zhang, F.S., Christie, P., 1999. Interspecific complementary and competitive interactions between intercropped maize and faba bean. *Plant Soil* 212, 105-114.
90. Li, Q.Z., Sun, J.H., Wei, X.J., Christie, P., Zhang, F.S., Li, L., 2011. Overyielding and interspecific interactions mediated by nitrogen fertilization in strip intercropping of maize with faba bean, wheat and barley. *Plant Soil* 339, 147-161.
91. Li, Y.Y., Yu, C.B., Cheng, X., Li, C.J., Sun, J.H., Zhang, F.S., Lambers, H., Li, L., 2009. Intercropping alleviates the inhibitory effect of N fertilization on nodulation and symbiotic N<sub>2</sub> fixation of faba bean. *Plant Soil* 323, 295-308.
92. Liang, Q., Yin, Y.P., Yang, T.X., 2004. Preliminary study on maize/soybean intercropping. *Tillage and Cultivation*. 5, 16-19+38 (in Chinese).
93. Liu, G.C., Li, L., Huang, G.B., Sun, J.H., Guo, T.W., Zhang, F.S., 2005. Intercropping advantage and contribution of above-ground and below-ground interactions in the barley-maize intercropping. *Scientia Agricultura Sinica* 38, 1787-1795 (in Chinese).

94. Liu, G.C., Yang, Q.F., Li, L., Sun, J.B., 2008. Intercropping advantage and contribution of above and below ground interactions in wheat/maize intercropping 2, 477-484. *Journal of Plant Ecology (Chinese version)* (in Chinese).
95. Liu, H.L., 2010. Mechanism of enhanced phosphorus utilization in maize/faba bean and maize/soybean intercropping sierozems and irrigated desert soils. Master thesis. China Agricultural University, Beijing (in Chinese).
96. Liu, J.X., Lu, Y.G., Yuan, H.M., Zhang, Z.Z., Cui, B.W., 2008. The roots of the crop usually absorb and utilize studying to nitrogen under the maize/soybean intercropping condition. *Acta Agriculturae Boreali-Sinica* 1, 173-175. (in Chinese).
97. Liu, S.M., Huang, P., Chai, Q., Xie, P.X., Peng, Z.K., 2014. Effect of spatial arrangement on aggressivity and grain yield of maize/pea intercropping system. *Journal of Gansu Agricultural University*. 49, 61-65+71. (in Chinese).
98. Luo, L.Y., 2013. Interspecific interaction dynamics in maize/soybean intercropping system and its adjustment to increase system productivity. Master thesis. China Agricultural University, Beijing (in Chinese).
99. Lv, Y., Francis, C., Wu, P., Chen, X., Zhao, X., 2014. Maize–Soybean Intercropping Interactions Above and Below Ground. *Crop Science* 54, 914-922.
100. Mao, L.L., Zhang, L.Z., Li, W.Q., van der Werf, W., Sun, J.H., Spiertz, H., Li, L., 2012. Yield advantage and water saving in maize/pea intercrop. *Field Crops Res* 138, 11-20.
101. Mei, P.P., Gui, L.G., Wang, P., Huang, J.C., Long, H.Y., Christie, P., Li, L., 2012. Maize/faba bean intercropping with rhizobia inoculation enhances productivity and recovery of fertilizer P in a reclaimed desert soil. *Field Crops Res* 130, 19-27.
102. Mu, Y.P., Chai, Q., Yu, A.H., Yang, C.H., Qi, W.H., Feng, F.X., Kong, X.F., 2013. Performance of Wheat/Maize Intercropping is a Function of Belowground Interspecies Interactions. *Crop Science* 53, 2186-2194.
103. Qi, W.H., Chai, Q., 2010. Yield response to wheat/maize competitiveness in wheat/maize intercropping system under different root partition patterns. *Chinese Journal of Eco-Agriculture*. 18, 31-34. (in Chinese).
104. Qin, X.M., 2012. Regulation mechanisms behind rhizosphere interactions between plants in maize/legumes intercropping system under different phosphorus levels. Master thesis. China Agricultural University, Beijing (in Chinese).
105. Qin, A.Z., Huang, G.B., Chai, Q., Yu, A.Z., Huang, P., 2013. Grain yield and soil respiratory response to intercropping systems on arid land. *Field Crops Res* 144, 1-10.

106. Ren, G.H., Chai, Q., 2008. Spatial and temporal distribution of soil moisture and its utilization efficiency in intercropped winter wheat and corn system under limited supplementary irrigation. *Bulletin of Soil and Water Conservation*. 1, 145-149 (in Chinese).
107. Ren, Y.Y., Wang, Z.L., Wang, X.L., Zhang, S.Q., 2015. The effect and mechanism of intercropping pattern on yield and economic benefit on the Loess Plateau. *Acta Ecologica Sinica*. 35, 4168-4177 (in Chinese).
108. Shen, Z.H., 2008. Study on crop yield and water use under different intercropping patterns in arid land of Jinzhong. Doctoral thesis, Chinese Academy of Agricultural Sciences, Beijing (in Chinese).
109. Shi, Z.X., Chai, Q., Yang, C.H., Qin, A.Z., 2011. Effects of different nitrogen applications and intercropping stripe compound on yield and WUE under maize/pea intercropping. *Journal of Gansu Agricultural University*. 46, 39-43 (in Chinese).
110. Shi, Z.S., Chen, H.Y., Ma, Q.Z., Qin, J.G., 2014. Study on different row ratios between spring maize and peanut in North of Guangxi province in China. *Modern Agricultural Science and Technology* 14, 9-10 (in Chinese).
111. Song, Y.N., Zhang, F.S., Marschner, P., Fan, F.L., Gao, H.M., Bao, X.G., Sun, J.H., Li, L., 2007. Effect of intercropping on crop yield and chemical and microbiological properties in rhizosphere of wheat (*Triticum aestivum* L.), maize (*Zea mays* L.), and faba bean (*Vicia faba* L.). *Biol Fert Soils* 43, 565-574.
112. Su, Y.H., Huang, G.Q., Liu, X.Y., Liu, L.W., 2005. Studies on the mechanism of increasing yield and income of the intercropping system with maize and soybean in upland of red soil. *Acta Agricultural Universitatis Jiangxiensis* 2, 210-213 (in Chinese).
113. Sun, J.H., Li, L., Zhang, F.S., Ma, Z.M., 2007. Influence of nitrogen application on yield and water effect in wheat/maize intercropping system. *Chinese Agricultural Science Bulletin* 23, 345-348 (in Chinese).
114. Wang, L., Wang, Qi., Zhang, E.H., Liu, Q.L., Yu, H.L., 2014. Effect of nitrogen application on productivity and water use efficiency of wheat/maize intercropping system under straw mulching. *Chinese Journal of Eco-Agriculture*. 22, 955-964. (in Chinese).
115. Wang, Z.K., Zhao, X.N., Wu, P.T., He, J.Q., Chen, X.L., Gao, Y., Cao, X.C., 2015. Radiation interception and utilization by wheat/maize strip intercropping systems. *Agr Forest Meteorol* 204, 58-66.
116. Wu, K.S., Song, S.Y., Li, L., Sun, J.H., Zhao, J.H., 2014. Effects of nitrogen fertilizer application and rhizobial inoculation on yield and water use efficiency of pea/maize intercropping system. *Chinese Journal of Eco-Agriculture*. 22, 1274-1280. (in Chinese).
117. Xia, H.Y., Wang, Z.G., Zhao, J.H., Sun, J.H., Bao, X.G., Christie, P., Zhang, F.S., Li, L., 2013. Contribution of interspecific interactions and phosphorus

- application to sustainable and productive intercropping systems. *Field Crops Res* 154, 53-64.
118. Xiao, J.X., Tang, L., Zheng, Y., 2011. Effects of N fertilization on yield and nutrient absorption in rape and faba bean intercropping system. *Plant Nutrition and Fertilizer Science*. 17, 1468-1473 (in Chinese).
  119. Xiao, Y.B., Duan, Z.Y., Jin, H., Hu, W.L., Chen, S.H., Wei, C.F., 2007. Spared N response and yields advantage of intercropped wheat and faba bean. *Plant Nutrition and Fertilizer Science* 13, 267-271 (in Chinese).
  120. Yang, C., Huang, G., Chai, Q., Luo, Z., 2011. Water use and yield of wheat/maize intercropping under alternate irrigation in the oasis field of northwest China. *Field Crops Res* 124, 426-432.
  121. Yang, C.H., Chai, Q., Huang, G.B., 2010. Root distribution and yield responses of wheat/maize intercropping to alternate irrigation in the arid areas of northwest China. *Plant, Soil and Environment - UZEI (Czech Republic)* 56, 253-262.
  122. Yang, F., Wang, X.C., Liao, D.P., Lu, F.Z., Gao, R.C., Liu, W.G., Yong, T.W., Wu, X.L., Du, J.B., Liu, J., Yang, W.Y., 2015. Yield response to different planting geometries in maize soybean relay strip intercropping systems. *Agron J* 107, 296-304.
  123. Ye, Y.L. 2003. Effect of intercropping on nitrogen and water use. Doctoral thesis. China Agricultural University, Beijing (in Chinese).
  124. Yin, Wen., Zhao, C., Yu, A.Z., Chai, Q., Hu F.L., Feng, F.X., 2015. Effect of straw returning and reduced tillage on interspecific competition and complementation in wheat/maize intercropping system. 41, 633-641. (in Chinese).
  125. Yu, Y.K., 2014. Effects of intercropping for maize and mung bean. *Heilongjiang Agricultural Science*. 2, 29-31. (in Chinese).
  126. Yue, G.G., Wang, E.M., Xu, Y.G., 1995. A study on row-space ratio of corn and soybean in intercropping system and its photosynthetic quantum. *Guizhou Agricultural Science* 3, 18-22 (in Chinese).
  127. Zhang, C.M., Zhang, Y.W., Guo, Z.L., Zhao, X.Y., Yan, H.B., Zhu, H.J., G.W., 2014. Research photosynthetic characteristic of adzuki bean and production efficiency under intercropping patterns. *Chinese Agricultural Science Bulletin*. 30, 226-231. (in Chinese).
  128. Zhang, B.C., Huang, G.B., Feng-Min, L.I., 2007. Effect of Limited Single Irrigation on Yield of Winter Wheat and Spring Maize Relay Intercropping. *Pedosphere* 17, 529-537.
  129. Zhao, J.H., Sun, J.H., Li, L., Li, W.Q., 2012. Effect of maize row spacing on yield of pea/maize intercropping system. *Chinese Journal of Eco-Agriculture*. 20, 1451-1456. (in Chinese).

130. Zhou, S.M., Ma, S.Q., Li, W., Zhang, S.T., 1998. Analysis of superiority of maize and peanut row intercropping. *Acta Agriculturae Universitatis Henanensis* 32, 18-23 (in Chinese).
131. Zhou, H.B., Lin, C., Chen, J., Francis, F., Haubruge, E., Yong, L., Bragard, C., Cheng, D.F., 2013. Adaptation of wheat-pea intercropping pattern in China to reduce *Sitobion avenae* (Hemiptera: Aphididae) occurrence by promoting natural enemies. *J Sustain Agr* 37, 1001-1016.
132. Zhu, X.T., Chen, J.Q., Tan, C.Y., Yang C.J., 2014. Optimization on plant row and spacing configuration of maize and soybean under 1, 2 intercropping planting model. *Soybean Science*. 33, 35-40 (in Chinese).

**Method S2: Additive partitioning method to calculate complementarity effect and selection effect, and the mathematical relationships between the net effect ratio, the land equivalent ratio, and the selection effect.**

Loreau and Hector (2001) (3) define the net effect (NE) as the sum of a complementarity effect (CE) and a selection effect (SE):

$$NE = CE + SE = N \times \overline{\Delta RY} \times \bar{M} + N \times \text{cov}(\Delta RY, M)$$

$$Y_1 + Y_2 - \bar{M} = (RYT - 1) \bar{M} + SE$$

Here  $\overline{\Delta RY}$  is the average relative yield gain of the two species,  $\bar{M}$  is the average yield of sole crops, and  $\text{cov}(\Delta RY, M)$  is the covariance between the relative yield gain in the intercrop and the sole crop.  $N$  is the number of species, which is in all cases of the dataset  $N=2$ .

$Y_1$  and  $Y_2$  are the yields (per unit of total area of the intercrop) of species 1 and 2 in the intercrop,  $P_1$  and  $P_2$  are the proportions of species 1 and 2 in an intercrop, based on their densities or designed row space, and  $M_1$  and  $M_2$  are the yields of species 1 and 2 in the pure stands.  $\bar{M}$  is the weighted average monoculture yield calculated as  $\bar{M} = P_1 M_1 + P_2 M_2$ . RYT is the relative yield total, which is identical in value to the LER.

To derive the relationship between the LER and the NER, we divide both sides by  $p_1 M_1 + p_2 M_2$ , obtaining:

$$\frac{Y_1 + Y_2}{P_1 M_1 + P_2 M_2} - 1 = \frac{(RYT - 1)(P_1 M_1 + P_2 M_2)}{P_1 M_1 + P_2 M_2} + \frac{SE}{P_1 M_1 + P_2 M_2}$$

which simplifies to:

$$\text{NER} - 1 = \text{LER} - 1 + \frac{\text{SE}}{\overline{\text{M}}}$$

Therefore:

$$\text{NER} = \text{LER} + \frac{\text{SE}}{\overline{\text{M}}}$$

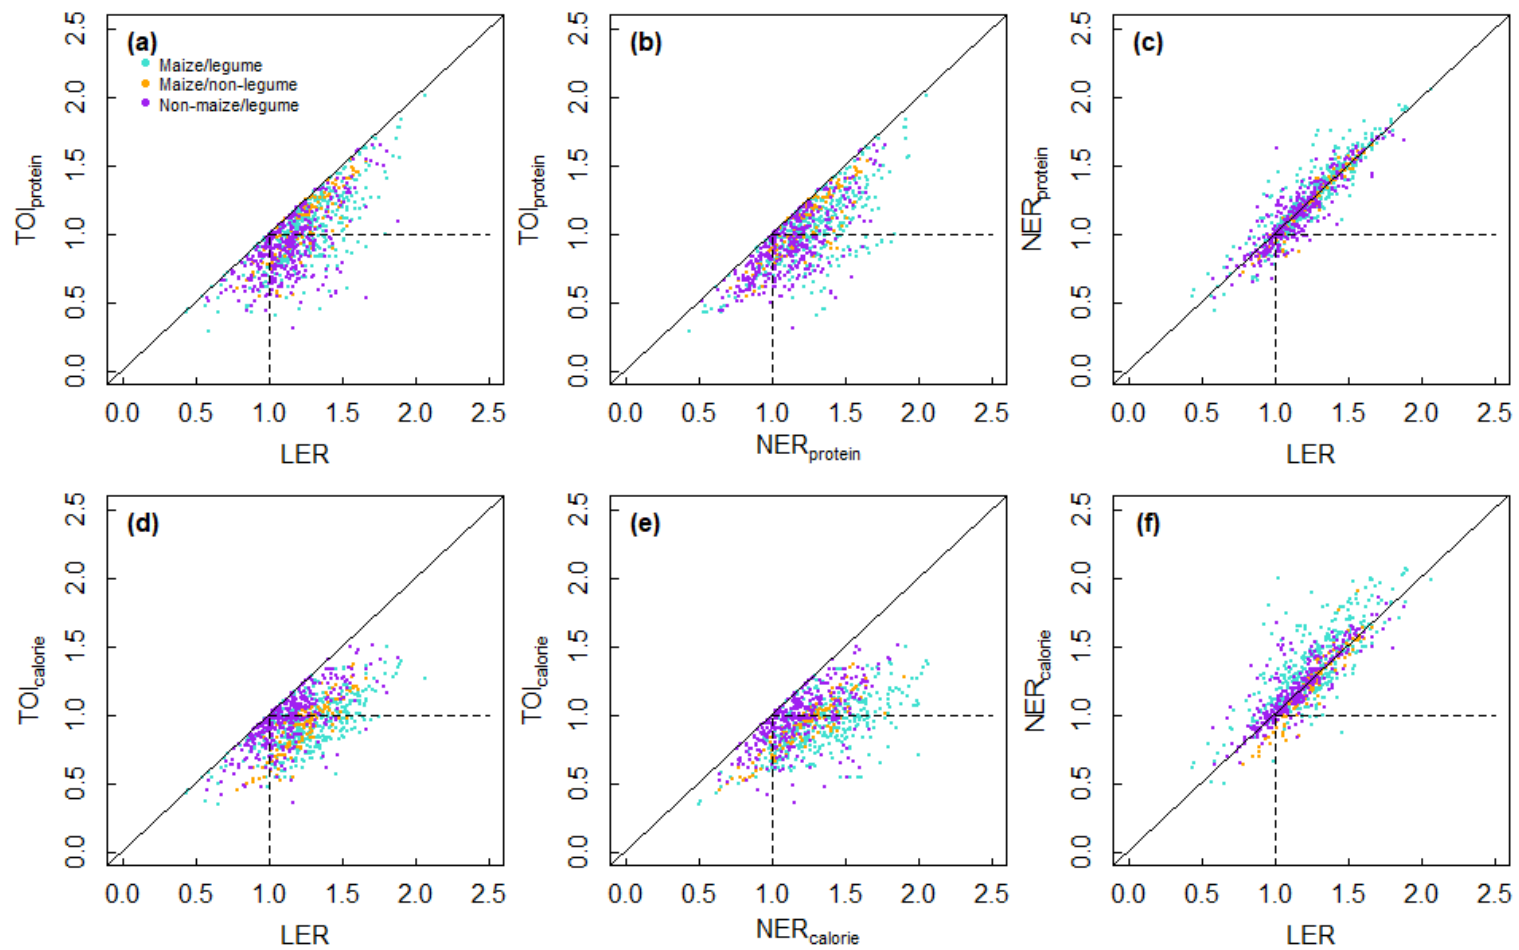

**Fig. S1 Bivariate scatter plots illustrating relationships between different metrics. The LER (land equivalent ratio) based on grain yield**



( $LER_{\text{grain}}$ ),  $NER$  and  $TOI$  based on grain calorie yield ( $NER_{\text{calorie}}$ ,  $TOI_{\text{calorie}}$ ) and protein yield ( $NER_{\text{protein}}$ ,  $TOI_{\text{protein}}$ ) in different species combinations in intercropping: maize/legume (turquoise), maize/non-legume (orange), non-maize/legume intercrops (purple). The diagonal lines represent the 1:1 lines, while the horizontal dashed lines represent  $TOI_{\text{calorie}} = 1$ , and the vertical dashed lines represent  $NER_{\text{calorie}}=1$  or  $LER_{\text{grain}} = 1$ .

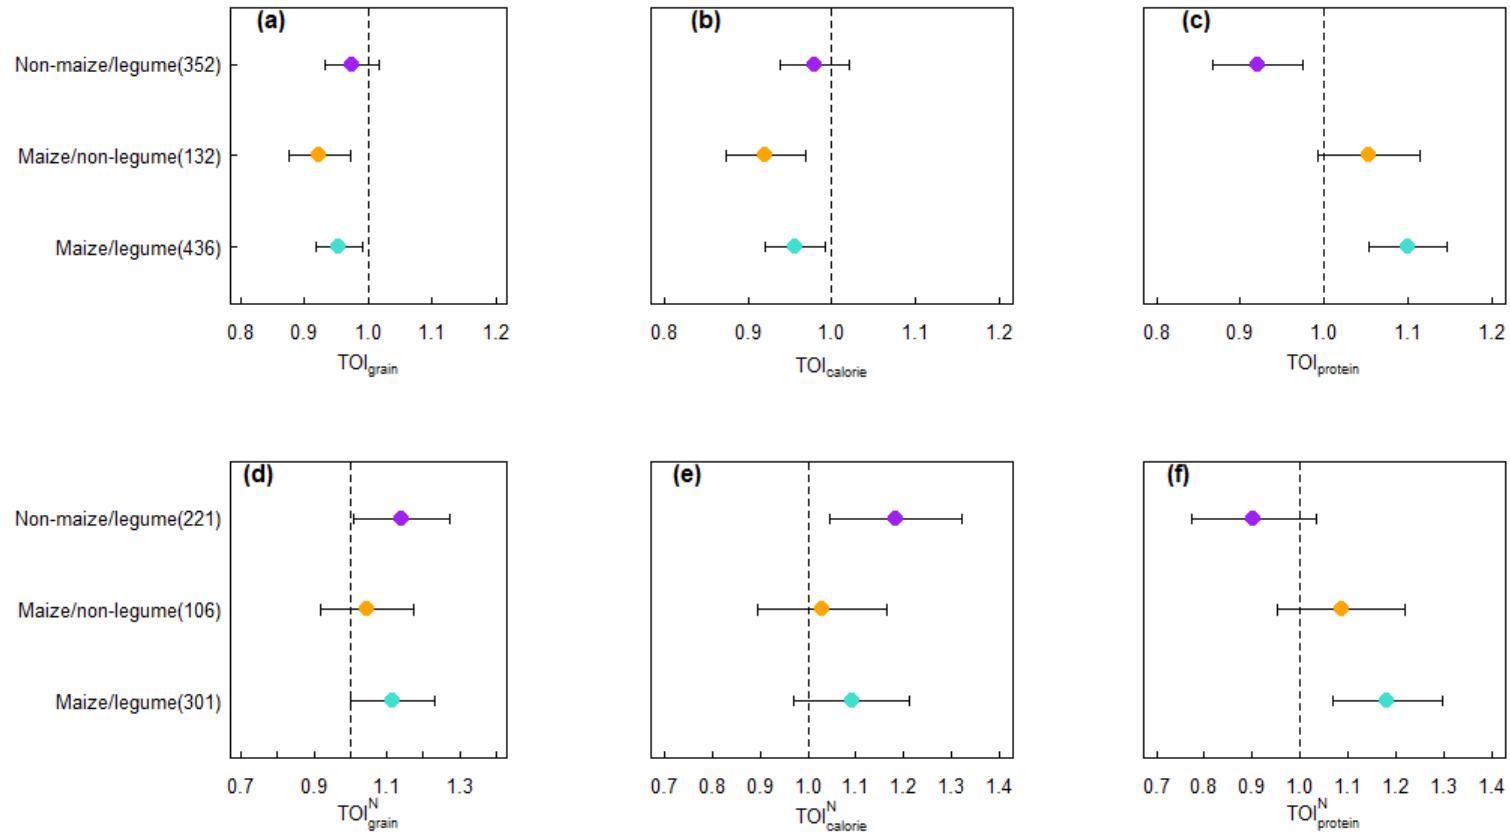

**Fig. S2 Transgressive overyielding across all species combinations.** Estimated mean (and 95% confidence intervals) of TOI for grain yield ( $TOI_{\text{grain}}$ ), for calorie yield ( $TOI_{\text{calorie}}$ ), protein yield ( $TOI_{\text{protein}}$ ) and N fertilizer TOI for grain yield ( $TOI_{\text{grain}}^{\text{N}}$ ), calorie yield ( $TOI_{\text{calorie}}^{\text{N}}$ ) and protein

yield ( $\text{TOI}_{\text{protein}}^{\text{N}}$ ). The TOIs with respect to N fertilizer ( $\text{TOI}_{\text{grain}}^{\text{N}}$ ,  $\text{TOI}_{\text{calorie}}^{\text{N}}$ ,  $\text{TOI}_{\text{protein}}^{\text{N}}$ ) characterize the extent to which the partial factor productivity of N fertilizer on intercrop grain yield, calories and protein exceeds that of the sole crop species with the highest grain yield, calorie yield or protein yield, respectively.

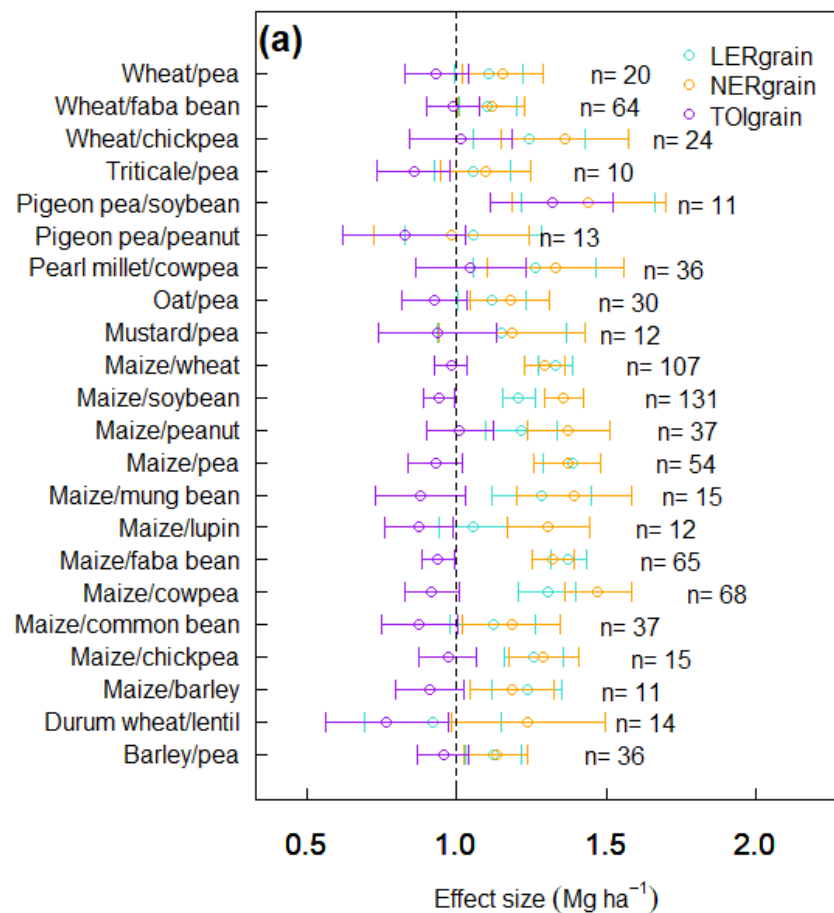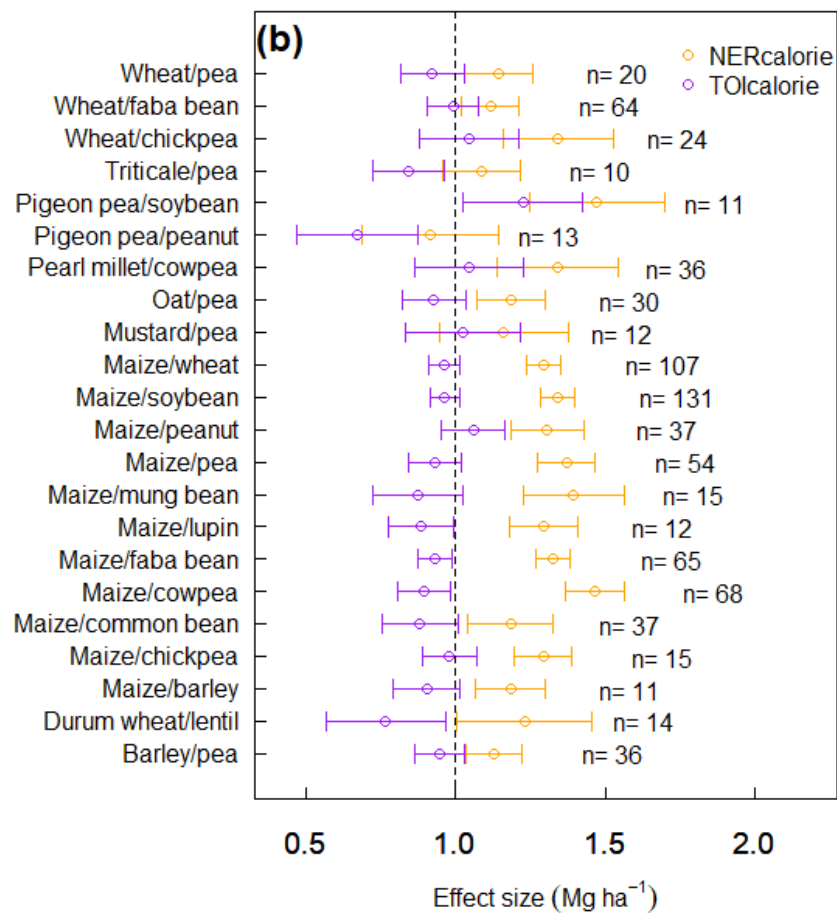

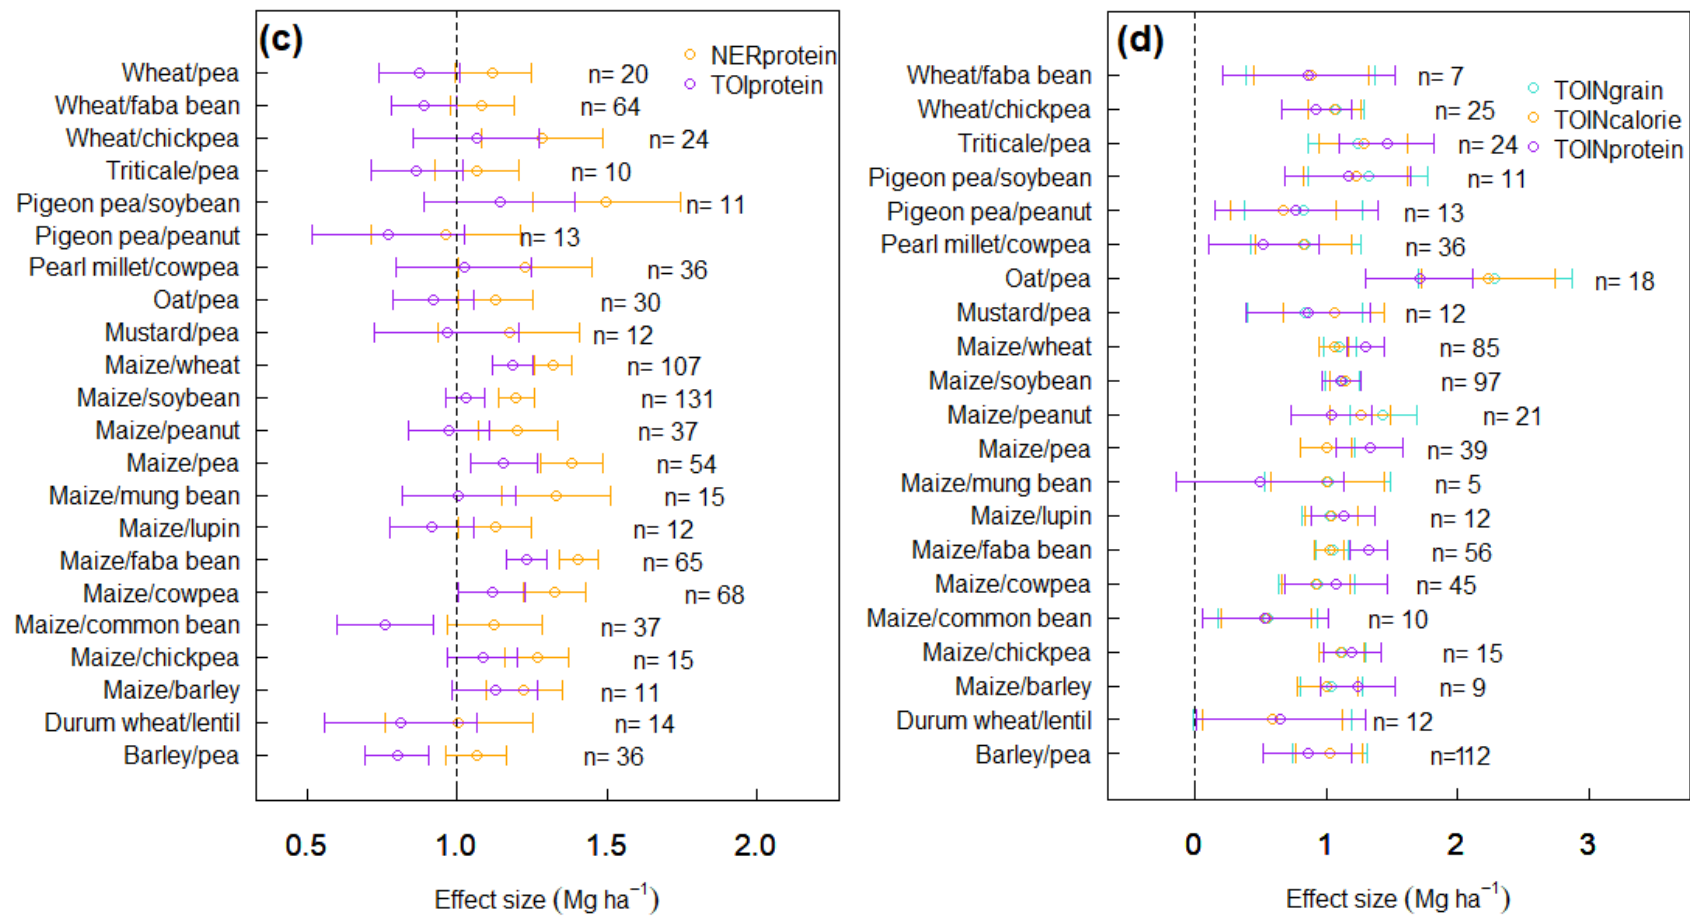

**Fig. S3 Effect size of different metrics across species combinations.** LER, NER, TOI based on grain yield (a), NER and TOI based on grain calorie yield (b), grain protein yield (c) and  $TOI_{protein}^N$  of species combinations with  $\geq 10$  data records. Circles represent the means for a species

combination, estimated with a mixed-effects model. The error bars represent 95% confidence intervals.

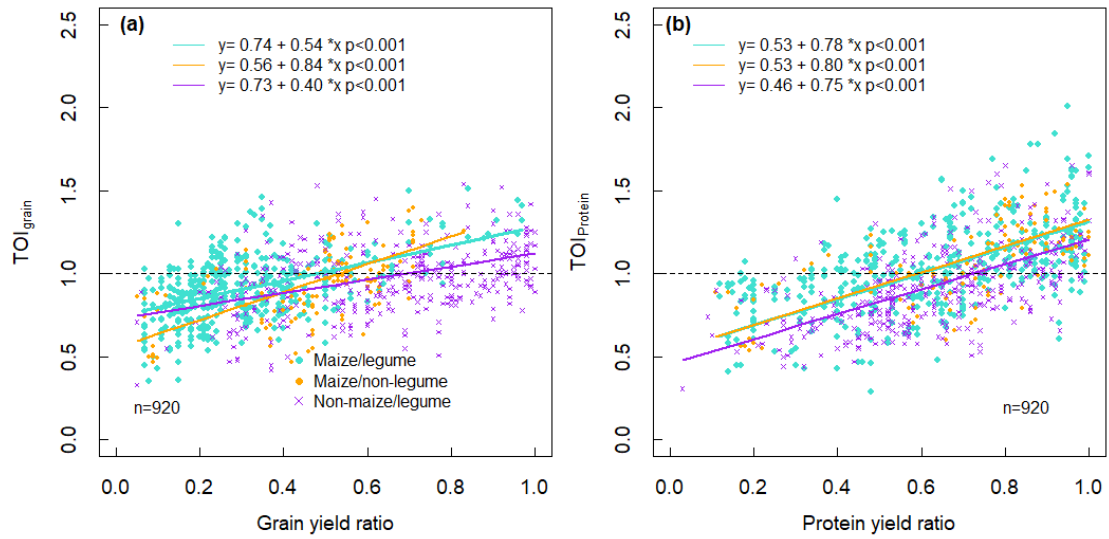

**Fig. S4 Relationships between the transgressive overyielding index and yield ratio, both for grain yield (a) and protein yield (b).** TOI increases significantly with yield ratio, both for grain yield and for protein yield.

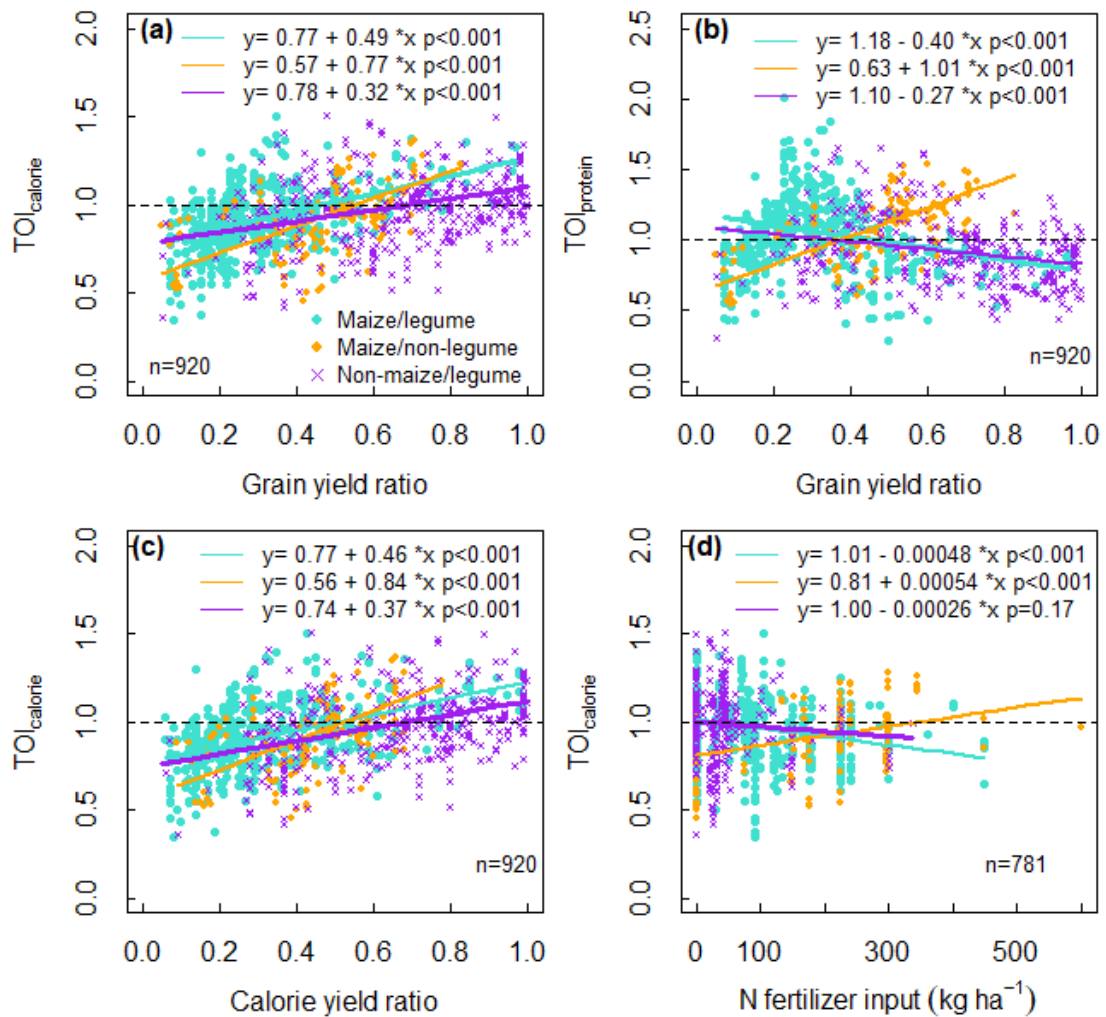

**Fig. S5 Relationships between the transgressive overyielding index for calorie and protein yield and grain yield ratio, calorie yield ratio and N fertilizer input.** Calorie TOI and the yield ratio of low yielding species to that of high yielding species (a), the relationship between the protein TOI and the grain yield ratio of low yielding species to that of high yielding species (b), the relationship between the calorie TOI and the calorie yield ratio of low yielding species to that of high yielding species (c) the relationship between the calorie TOI and N fertilizer input (d). TOI for grain yield increases with grain yield ratio while TOI for calorie yield increases with calorie yield ratio. TOI for protein yield increases with grain yield ratio in maize/non-legume intercrops but decreases with grain yield ratio in maize/legume and non-maize/legume intercrops. TOI for calorie yield increases with N fertilizer input in maize/non-legume intercrops but decreases with N fertilizer input in maize/legume intercrops.



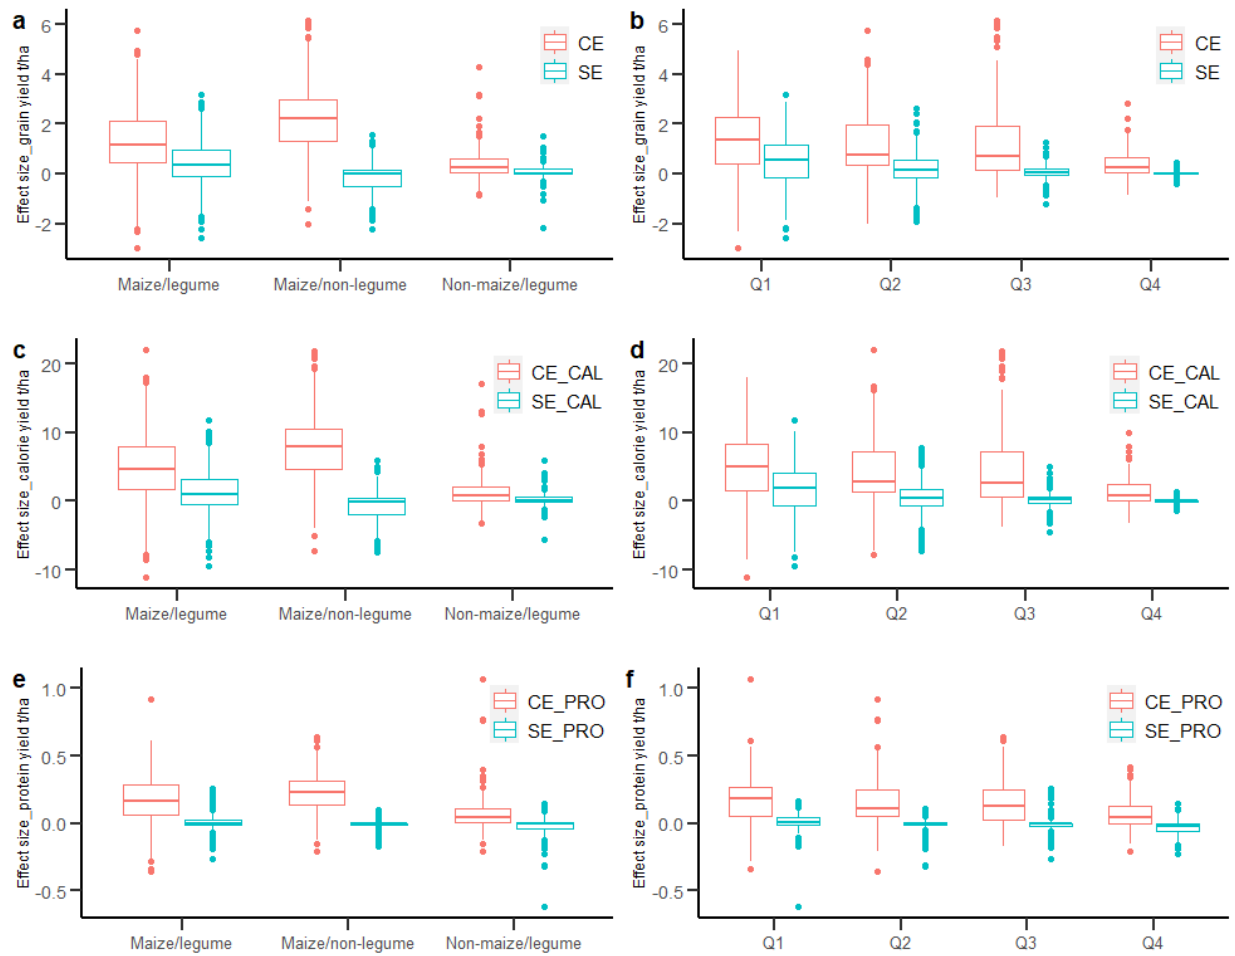

**Fig. S6** Boxplots illustrating how the complementarity effect and selection effect of species mixtures vary between different species combinations and how they are related to yield ratio of the sole crops. The complementarity effect (CE) and selection effect (SE) for grain yield (CE, SE), calorie yield (CE\_CAL, SE\_CAL) and protein yield (CE\_PRO, SE\_PRO) of different species combinations: maize/legume, maize/non-legume, non-maize/legume intercrops (a, c, e), and of four subgroups according to the grain yield ratio of low yielding species to that of the high yielding species (Q1:0-0.25, Q2: 0.25-0.50, Q3: 0.50-0.75, Q4: 0.75-1.00) (b, d, f). The CEs were larger in maize/legume intercrops than in non-maize/legume intercrops. The SEs were also larger in maize/legume intercrops than in non-maize/legume intercrops, but the SEs were mostly around zero. The SEs tended toward zero and the CEs decreased but were mostly larger than zero as the yield of the low yielding species approached that of the higher yielding species.

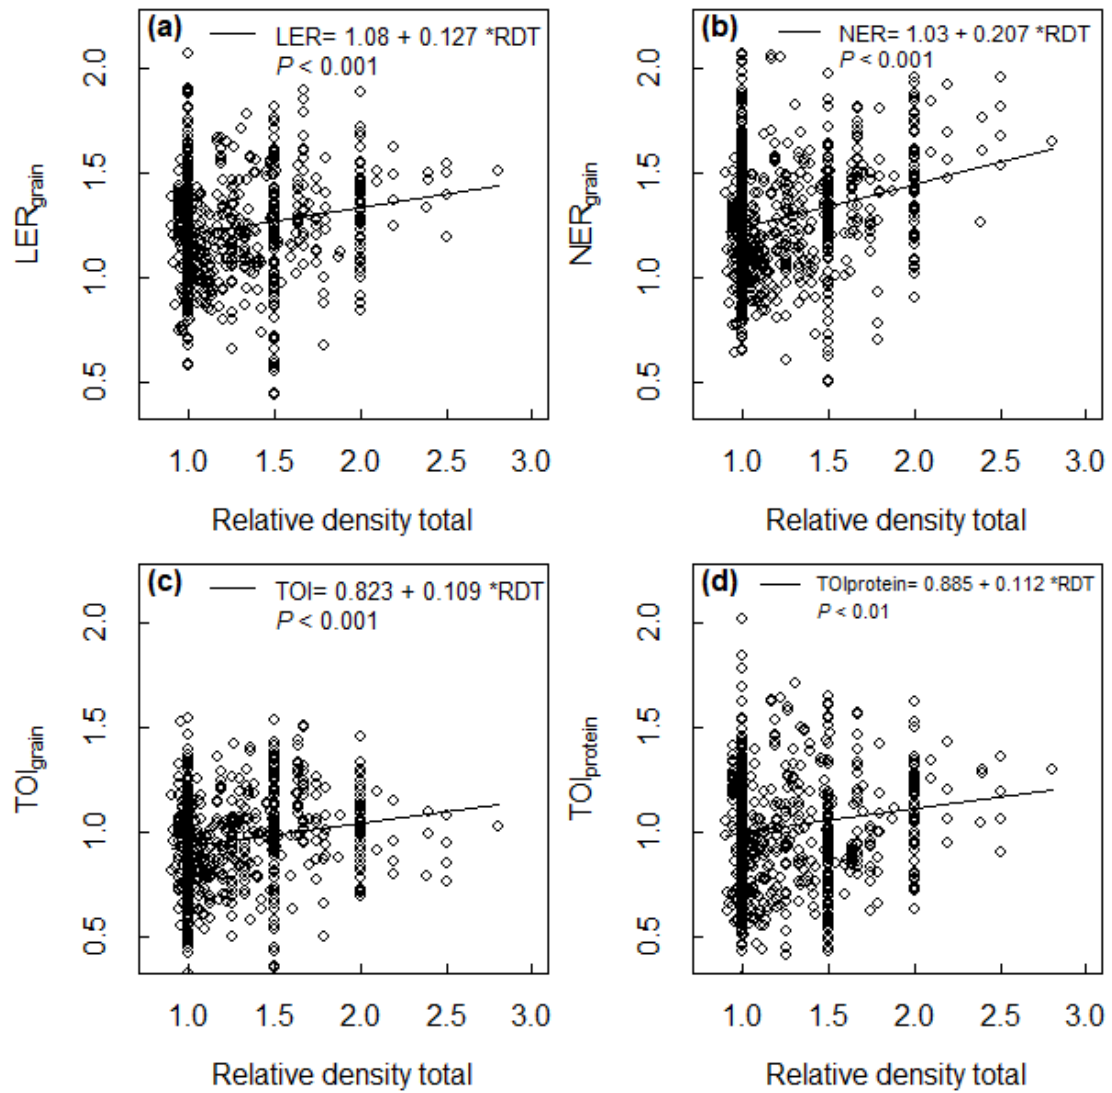

**Fig. S7** Scatter plot of LER, NER and TOI for grain yield and TOI for protein yield against relative density total.

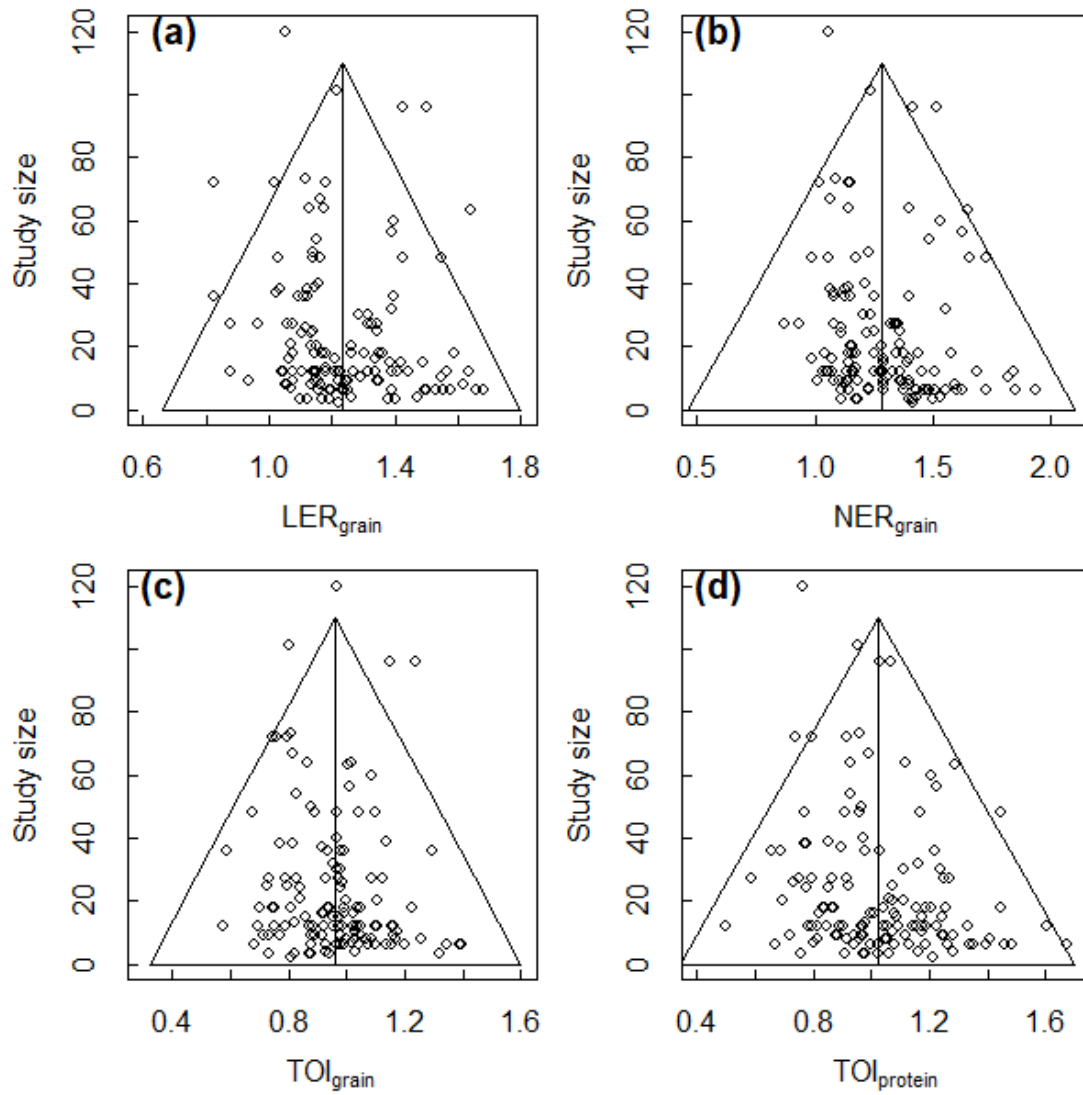

**Fig. S8 Funnel plots.** Funnel plots show study size (y-axis) against metric values (x-axis) (a) Land equivalent ratio ( $LER_{grain}$ ), (b) net effect ratio ( $NER_{grain}$ ) and (c) transgressive overyielding index for grain yield ( $TOI_{grain}$ ) and for protein yield ( $TOI_{protein}$ ). The vertical line in each panel represents the estimated grand mean of  $LER_{grain}$ ,  $NER_{grain}$ ,  $TOI_{grain}$  and  $TOI_{protein}$ , estimated with a mixed effects model.

**Table S1 Contingency table for number of data records of intercrops including maize, non-maize, legume and non-legume species.** Analyses were made for the subgroups of maize/legume, maize/non-legume, and non-maize/legume. The sub-group non-maize/non-legume had too few records to allow accurate estimation of effect sizes.

|            | Maize | Non maize |
|------------|-------|-----------|
| Legume     | 436   | 352       |
| Non legume | 132   | 14        |

**Table S2 Overview of species combinations in the data set**

| Groups of species combinations | Records of groups | Species combination                                                              |
|--------------------------------|-------------------|----------------------------------------------------------------------------------|
| Maize/legume                   | 436               | Maize ( <i>Zea mays</i> )/adzuki bean ( <i>Vigna angularis</i> )                 |
|                                |                   | Maize ( <i>Zea mays</i> )/common bean ( <i>Phaseolus vulgaris</i> )              |
|                                |                   | Maize ( <i>Zea mays</i> )/chickpea ( <i>Cicer arietinum</i> )                    |
|                                |                   | Maize ( <i>Zea mays</i> )/cowpea ( <i>Vigna unguiculata</i> )                    |
|                                |                   | Maize ( <i>Zea mays</i> )/faba bean ( <i>Vicia faba</i> )                        |
|                                |                   | Maize ( <i>Zea mays</i> )/white lupin ( <i>Lupinus albus</i> )                   |
|                                |                   | Maize ( <i>Zea mays</i> )/mung bean ( <i>Vigna radiata</i> )                     |
|                                |                   | Maize ( <i>Zea mays</i> )/pea ( <i>Pisum sativum</i> )                           |
|                                |                   | Maize ( <i>Zea mays</i> )/peanut ( <i>Arachis hypogaea</i> )                     |
|                                |                   | Maize ( <i>Zea mays</i> )/soybean ( <i>Glycine max</i> )                         |
| Maize/small grain              | 120               | Maize ( <i>Zea mays</i> )/wheat ( <i>Triticum aestivum</i> )                     |
|                                |                   | Millet ( <i>Setaria italica</i> )/maize ( <i>Zea mays</i> )                      |
|                                |                   | Maize ( <i>Zea mays</i> )/barley ( <i>Hordeum vulgare</i> )                      |
| Maize/others                   | 12                | Maize ( <i>Zea mays</i> )/turnip ( <i>Brassica campestris</i> )                  |
|                                |                   | Maize ( <i>Zea mays</i> )/oilseed rape ( <i>Brassica napus</i> )                 |
| Small grain/legume             | 284               | Pearl millet ( <i>Pennisetum glaucum</i> )/cowpea ( <i>Vigna unguiculata</i> )   |
|                                |                   | Pearl millet ( <i>Pennisetum glaucum</i> )/peanut ( <i>Arachis hypogaea</i> )    |
|                                |                   | Oat ( <i>Avena sativa</i> )/faba bean ( <i>Vicia faba</i> )                      |
|                                |                   | Oat ( <i>Avena sativa</i> )/pea ( <i>Pisum sativum</i> )                         |
|                                |                   | Rice ( <i>Oryza sativa</i> )/mung bean ( <i>Vigna radiata</i> )                  |
|                                |                   | Rice ( <i>Oryza sativa</i> )/peanut ( <i>Arachis hypogaea</i> )                  |
|                                |                   | Sorghum ( <i>Sorghum bicolor</i> )/cowpea ( <i>Vigna unguiculata</i> )           |
|                                |                   | Sorghum ( <i>Sorghum bicolor</i> )/pigeon pea ( <i>Cajanus cajan</i> )           |
|                                |                   | Triticale ( $\times$ <i>Triticosecale</i> Wittmack)/pea ( <i>Pisum sativum</i> ) |
|                                |                   | Wheat ( <i>Triticum aestivum</i> )/chickpea ( <i>Cicer arietinum</i> )           |

|                         |    |                                                                                        |
|-------------------------|----|----------------------------------------------------------------------------------------|
|                         |    | Wheat ( <i>Triticum aestivum</i> )/faba bean ( <i>Vicia faba</i> )                     |
|                         |    | Durum wheat ( <i>Triticum turgidum</i> )/lentil ( <i>Lens culinaris</i> )              |
|                         |    | Wheat ( <i>Triticum aestivum</i> )/pea ( <i>Pisum sativum</i> )                        |
|                         |    | Wheat ( <i>Triticum aestivum</i> )/soybean ( <i>Glycine max</i> )                      |
|                         |    | Barley ( <i>Hordeum vulgare</i> )/faba bean ( <i>Vicia faba</i> )                      |
|                         |    | Barley ( <i>Hordeum vulgare</i> )/lentil ( <i>Lens culinaris</i> )                     |
|                         |    | Barley ( <i>Hordeum vulgare</i> )/narrow-leafed lupin ( <i>Lupinus angustifolius</i> ) |
|                         |    | Barley ( <i>Hordeum vulgare</i> )/pea ( <i>Pisum sativum</i> )                         |
|                         |    | Durum wheat ( <i>Triticum turgidum</i> )/pea ( <i>Pisum sativum</i> )                  |
| Legume/legume           | 25 | Pea ( <i>Pisum sativum</i> )/faba bean ( <i>Vicia faba</i> )                           |
|                         |    | Pigeon pea ( <i>Cajanus cajan</i> )/peanut ( <i>Arachis hypogaea</i> )                 |
|                         |    | Pigeon pea ( <i>Cajanus cajan</i> )/soybean ( <i>Glycine max</i> )                     |
| Legume/others           | 43 | Mustard ( <i>Sinapsis alba</i> )/chickpea ( <i>Cicer arietinum</i> )                   |
|                         |    | Mustard ( <i>Sinapsis alba</i> )/lentil ( <i>Lens culinaris</i> )                      |
|                         |    | Mustard ( <i>Sinapsis alba</i> )/pea ( <i>Pisum sativum</i> )                          |
|                         |    | Sesame ( <i>Sesamum indicum</i> )/mung bean ( <i>Vigna radiata</i> )                   |
|                         |    | Sesame ( <i>Sesamum indicum</i> )/blackgram ( <i>Vigna mungo</i> )                     |
|                         |    | Sesame ( <i>Sesamum indicum</i> )/peanut ( <i>Arachis hypogaea</i> )                   |
|                         |    | Oilseed rape ( <i>Brassica napus</i> )/faba bean ( <i>Vicia faba</i> )                 |
|                         |    | Oilseed rape ( <i>Brassica napus</i> )/pea ( <i>Pisum sativum</i> )                    |
| Small grain/small grain | 3  | Wheat ( <i>Triticum aestivum</i> )/barley ( <i>Hordeum vulgare</i> )                   |
| Small grain/others      | 7  | Wheat ( <i>Triticum aestivum</i> )/oilseed rape ( <i>Brassica napus</i> )              |
|                         |    | Barley ( <i>Hordeum vulgare</i> )/flax ( <i>Linum usitatissimum</i> )                  |
|                         |    | Barley ( <i>Hordeum vulgare</i> )/oilseed rape ( <i>Brassica napus</i> )               |
| Others/others           | 4  | Sesame ( <i>Sesamum indicum</i> )/sunflower ( <i>Helianthus annuus</i> )               |

---

**Table S3 Number of data records with substitutive design and additive designs.**

| Intercropping design | Number of records |
|----------------------|-------------------|
| Substitutive design  | 542               |
| Additive design      | 392               |

**Table S4 Number of data records representing strip intercropping, alternate-row intercropping and mixed intercropping.**

| Intercropping pattern       | Number of records |
|-----------------------------|-------------------|
| Strip intercropping         | 590               |
| Alternate-row intercropping | 161               |
| Mixed intercropping         | 183               |

## SI References

1. Li C, Hoffland E, Kuyper TW, Yu Y, Li H, Zhang C, Zhang F, van der Werf W. 2020. Yield gain, complementarity and competitive dominance in intercropping in China: A meta-analysis of drivers of yield gain using additive partitioning. *Eur J Agron.* 113.
2. Yu Y, Stomph T-J, Makowski D, Van der Werf W. 2015. Temporal niche differentiation increases the land equivalent ratio of annual intercrops: a meta-analysis. *Field Crops Res.* 184, 133-144.
3. Loreau M, Hector A. 2001. Partitioning selection and complementarity in biodiversity experiments. *Nature.* 412, 72-76.
